# Supplementary material for: Does giving pasireotide to patients undergoing pancreaticoduodenectomy always pay for itself?
Source: Springer Nature journal article supplement (doi:10.1007/s10353-018-0563-8), 2018-12-10
Supplement: MOESM2 [file 16331396]

**Table S2: Market price of 14 doses of pasireotide and the price after converting into Canadian currency from fourteen different countries/regions according to hospital pricing.**

| **COUNTRY/REGION** | **Local Price** | **In Canadian dollar after using PPP conversion price** |
| --- | --- | --- |
| **CANADA** | CAN 1,257 | 1,257 |
| **USA** | USD 3,220 | 4,057 |
| **UK** | BP 756 | 1,342 |
| **TAIWAN** | NTD 35,000 | 2,714 |
| **TURKEY** | TL 2,223 | 2,373 |
| **GREECE** | EUR 964 | 1,929 |
| **COSTA RICA** | USD 1,575 | 1,985 |
| **NETHERLANDS** | EUR 904 | 1,372 |
| **FINLAND** | EUR 1,055 | 1,329 |
| **SPAIN** | EUR 1,294 | 1,631 |
| **ISRAEL** | Shekels 5,221.52 | 1,641 |
| **SERBIA** | Serbian Dinar 456,733 | 3,125 |
| **NORWAY** | Crowns 9,248 | 1,180 |
| **SAUDI ARABIA** | Riyal 5,045 | 4,380 |

PPP: Purchasing Power Parity
